# Supplementary material for: Celecoxib attenuates hepatocellular proliferative capacity during hepatocarcinogenesis by modulating a PTEN/NF-κB/PRL-3 pathway
Source: Royal Society of Chemistry journal article supplement (doi:10.1039/c9ra00429g), 2019-01-01

## ***Supplementary Materials***

### **Celecoxib attenuates hepatocellular proliferative capacity during hepatocarcinogenesis by modulating a PTEN/NF- $\kappa$ B/PRL-3 pathway**

**\*Corresponding author:** Zhenpeng Qiu, M.D., College of Pharmacy, Hubei University of Chinese Medicine, No. 1, West Huangjiahu Road, Wuhan 430065, People's Republic of China; e-mail address: [whuqq@hotmail.com](mailto:whuqq@hotmail.com).

**Supplementary Table 1.** Sequences of primers used in quantitative real-time PCR (qPCR).

| <b>Gene</b>                     | <b>Sequences (5' to 3')</b>               | <b>Length (bp)</b> |
|---------------------------------|-------------------------------------------|--------------------|
| <b><math>\beta</math>-actin</b> | <b>Forward:</b> CGTTGACATCCGTAAAGACCTC    | 110                |
|                                 | <b>Reverse:</b> TAGGAGCCAGGGCAGTAATCT     |                    |
| <b>c-Myc</b>                    | <b>Forward:</b> CCAGCCAAGGTTGTGAGGTTAGG   | 176                |
|                                 | <b>Reverse:</b> CAGACGTAAACAGCTCCGAA      |                    |
| <b>Cyclin D1</b>                | <b>Forward:</b> GAACAAACAGATCATCCGCAAACAC | 231                |
|                                 | <b>Reverse:</b> TGCTCCTGGCAGGCCCGGAGGCAGT |                    |
| <b>PRL-3</b>                    | <b>Forward:</b> GCCATCCAGTTCACCGACA       | 210                |
|                                 | <b>Reverse:</b> CAGAGCAGGGACGCACATAG      |                    |

**Supplementary Table 2.** List of the primary antibodies used for Western blot analysis (WB) and/or immunohistochemistry (IHC).

| Protein    | Antibody (and catalog number)  | Application |
|------------|--------------------------------|-------------|
| β-actin    | Mouse monoclonal (A1978)       | WB ^        |
| c-Myc      | Rabbit polyclonal (10828-1-AP) | WB #        |
| Cyclin D1  | Rabbit monoclonal (2978)       | WB †        |
| E-cadherin | Rabbit polyclonal (GB11082)    | IHC *       |
| FASN       | Rabbit monoclonal (3180)       | WB †        |
| Ki67       | Rabbit monoclonal (12202)      | IHC †       |
| NF-κB      | Mouse monoclonal (6956)        | WB, IHC †   |
| PRL-3      | Rabbit polyclonal (6484)       | WB †        |
| PTEN       | Rabbit polyclonal (22034-1-AP) | WB #        |

† Provided by Cell Signaling Technology Inc. (Danvers, MA).

\* Provided by Servicebio (Wuhan, China).

# Provided by Proteintech (Wuhan, China)

^ Provided by Sigma-Aldrich (St. Louis, MO)

**Supplementary Figure 1.** H&E staining of wild-type (WT), AKT/c-Met, AKT/c-Met-CELE-L and AKT/c-Met-CELE-H mouse livers at eight weeks post hydrodynamic injection of AKT and c-Met. CELE-L and CELE-H represent intragastric administration of celecoxib at low (125 mg) and high (250 mg) doses, respectively. The areas of neoplasm (indicated by T) were only observed the liver parenchyma of AKT/c-Met mice. The areas of steatosis were indicated by asterisk. Original magnification: 100×; Scale bar: 100  $\mu$ m.

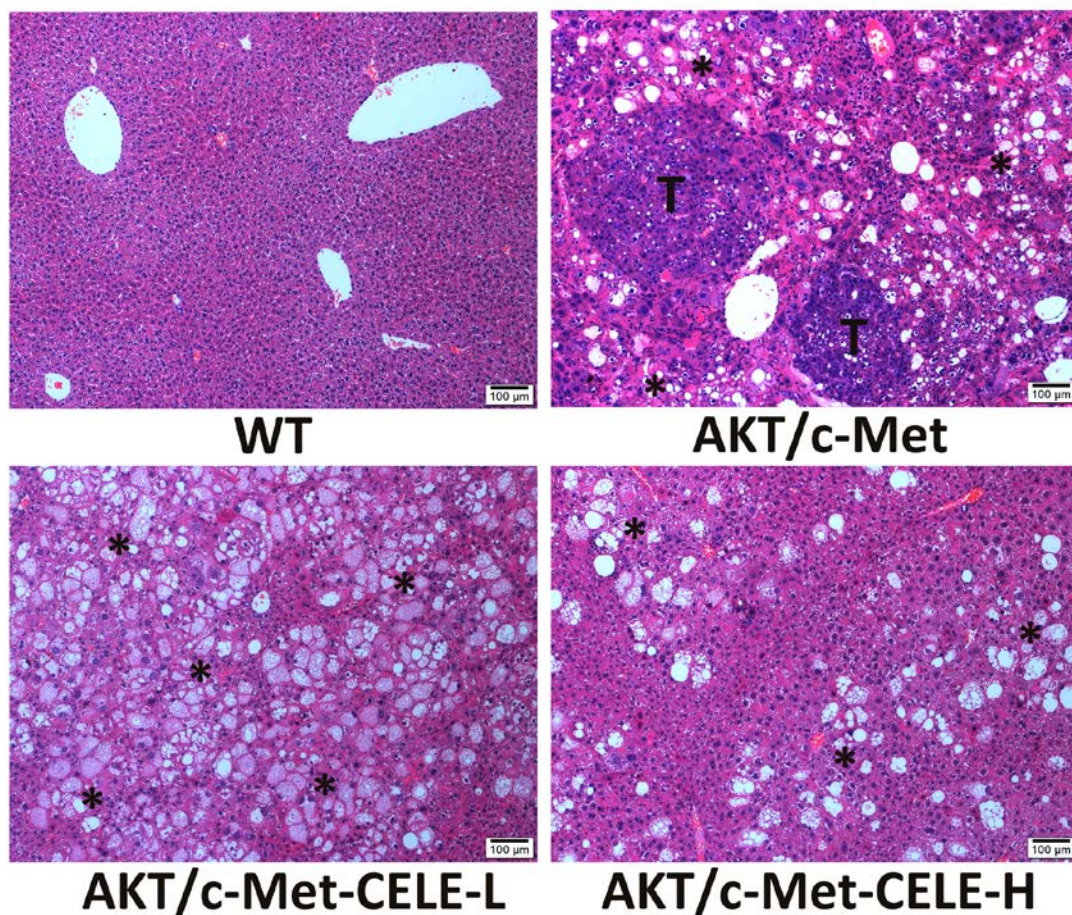

Supplement: c9ra00429g1.pdf [file c9ra00429g1.pdf]
